# Supplementary material for: Ultra-small porous WN/W2C nanoparticles for sustained hydrogen production by a polyoxometalate-intercalated pyrolysis strategy
Source: Royal Society of Chemistry journal article supplement (doi:10.1039/d2nj04218e), 2022-01-01
Supplement: d2nj04218e1.pdf [file d2nj04218e1.pdf]

## Supporting Information

### Ultra-small porous WN/W<sub>2</sub>C nanoparticles for sustained hydrogen production by polyoxometalate-intercalated pyrolysis strategy

Ying Zhu,<sup>a</sup> Haiyan Zheng,<sup>a</sup> Xinyan Liu,<sup>a</sup> Chunyi Sun,<sup>a\*</sup> Man Dong,<sup>a</sup> Xinlong Wang <sup>a\*</sup> and Zhongmin Su <sup>a</sup>

<sup>a</sup> National & Local United Engineering Laboratory for Power Batteries, Key Laboratory of Polyoxometalate Science of Ministry of Education Department of Chemistry, Northeast Normal University Changchun, Jilin 130024, China

## 1. Experimental Section

### 1.1. Material Synthesis

#### 1.1.1. Synthesis of $Zn_3Al-NO_3$

The  $Zn_3Al-NO_3$  were synthesized through a common hydrothermal method.  $Zn(NO_3)_2 \cdot 6H_2O$  (0.03 mol) and  $Al(NO_3)_3 \cdot 9H_2O$  (0.01 mol) were dissolved together in 100ml boiling cooled  $CO_2$ -removed deionized water to form a salt solution named A. The other 100ml water dissolved 3.2 g (0.08 mol) NaOH to obtain an alkaline solution called B. A and B were poured into a beaker at the same time and stirred vigorously, maintaining PH  $\approx$  10 at room temperature. The white colloid was then obtained and quickly transferred to a 250 mL Teflon-lined autoclave, heating at 100 °C for 12 h. After the reactor cooled to room temperature naturally, collected white precipitate by centrifugation and washed with boiling cooled water. Subsequently, one half dried at 60 °C for 12 h under vacuum environment for characterization. Dispersed the other half precipitate into 100mL boiling cooled water to form suspension liquid and kept  $N_2$  input for use.

#### 1.1.2. Synthesis of $K_5CoW_{12}O_{40}$

The preparation of  $K_5CoW_{12}O_{40}$  was based on the procedure described by Song et al.<sup>1</sup>

#### 1.1.3. Synthesis of $Zn_3Al-CoW_{12}$

2 mmol of  $K_5CoW_{12}O_{40}$  was dissolved in 100 mL boiling cooled to gain polyacid aqueous solution, added it into  $Zn_3Al-NO_3$  slowly then reacted at 60 °C for 5 h. Centrifuged to collect green-yellow precipitate and washed with boiling cooled water for three times. Finally, the obtained product was dried at 60 °C for 12 h in a vacuum.

#### 1.1.4. Synthesis of $WN/W_2C@PC-1$ , $WN/W_2C@PC-2$ , $WN/W_2C@PC-3$ and $W/WN/CCo_2W_4@PC-4$

$Zn_3Al-CoW_{12}$  (0.1 g), glucose (2 g), and  $NH_4Cl$  (2 g) were added into a 50 mL stainless steel grinding jar with 20 agate balls 5 mm in diameter, then grinded in a ball mill for 1 h at 35 Hz. The mixture was placed in a tube furnace and step-by-step calcination. First, the powder was annealed at 850 °C for 90 min and further heated to 900 °C maintained 30 min with a rate of 5 °C/min under Ar flow. The black solid was finally obtained after naturally cooling to room temperature, then treated it with 3 M HCl under ultrasonic conditions. Subsequently, the product was washed with a large amount of deionized water until the solution was neutral, centrifuged. Finally, the sample was dried at 60 °C overnight for use.  $WN/W_2C@PC-2$ ,  $WN/W_2C@PC-3$  and  $W/WN/CCo_2W_4@PC-4$  were obtained by the same method as above but change the calcination conditions to 800 °C, 850 °C and 900 °C for 120 min, respectively.

#### 1.1.5. Synthesis of $WN@PC-K_5CoW_{12}O_{40}$ , $WN@PC$ -mixture and $C-Zn_3Al-NO_3$

$Zn_3Al-CoW_{12}$  (0.1 g) used for the synthesis of  $WN/W_2C@PC-1$  was replaced by  $K_5CoW_{12}O_{40}$  (0.1g), the mixture of  $K_5CoW_{12}O_{40}$  (0.0587g) and  $Zn_3Al-NO_3$  (0.0413g), and  $Zn_3Al-NO_3$  (0.1g), respectively, then treated under the same ball milling and calcination conditions with  $WN/W_2C@PC-1$  to gain  $WN@PC-K_5CoW_{12}O_{40}$ ,  $WN@PC$ -mixture and  $C-Zn_3Al-NO_3$ .

## 1.2. Electrode preparation and electrochemical characterization

All the electrochemical measurements of as-synthesized electrocatalysts were performed on an electrochemical station (CHI760E, Shanghai Chenhua Instruments Co, China). An Ag/AgCl (3.5 M KCl solution) electrode and a graphite rod were employed as the reference electrode and counter electrode. For the working electrodes, 5 mg of the catalyst active materials were dispersed in the mixture of ethanol (100  $\mu$ L), ultrapure water (350  $\mu$ L) and 50  $\mu$ L of 5 wt% Nation solution by ultrasonication. All measured potentials were converted to the potential vs. the reversible hydrogen electrode (RHE) according to the Nernst equation below:  $E_{RHE} = E_{Ag/AgCl} + 0.059 pH + 0.197$ . For HER measurements, 6  $\mu$ L of the ink was dropped onto the GC electrode with a diameter of 3 mm and dried naturally at room temperature. As a comparison, commercial Pt/C catalyst (20 wt% platinum in carbon) electrodes were also prepared in the same configuration. The LSV curves were measured deaerated with nitrogen at a scan rate of 5 mV s<sup>-1</sup> in 0.5 M H<sub>2</sub>SO<sub>4</sub> and 1 M KOH aqueous solutions at 25 °C prior to the HER. The catalysts were activated using 20 cyclic voltammetry scans with a scan rate of 100 mV s<sup>-1</sup> before recording the electrochemical performance. The CV measurements were taken with scan rates of 10, 20, 30, 40, 50, 60, 70, 80, 90 and 100 mV s<sup>-1</sup>, respectively. EIS spectra were operated with the frequencies in the range of 0.1–100000 Hz at an amplitude of 5 mV.

## 2. Physical characterization of $\text{Zn}_3\text{Al-CoW}_{12}$ and $\text{Zn}_3\text{Al-NO}_3$

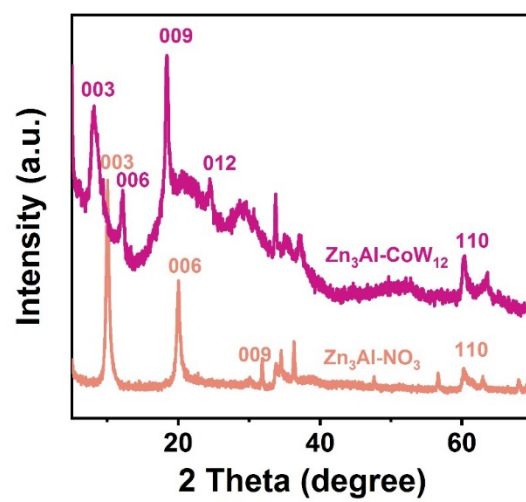

**Figure S1.** XRD patterns of  $\text{Zn}_3\text{Al-CoW}_{12}$  and  $\text{Zn}_3\text{Al-NO}_3$ .

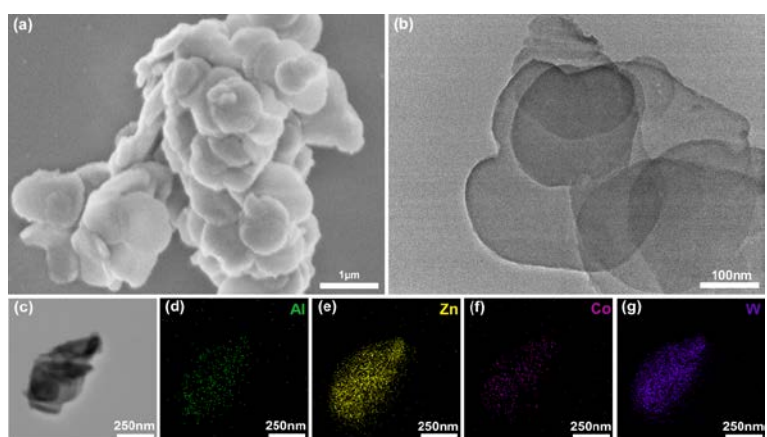

**Figure S2.** (a) SEM image of  $\text{Zn}_3\text{Al-CoW}_{12}$ . (b) TEM image of  $\text{Zn}_3\text{Al-CoW}_{12}$ . (c-g) EDX elemental mapping of Al, Zn, Co and W in  $\text{Zn}_3\text{Al-CoW}_{12}$ .

### 3. Physical characterization of electrocatalysts

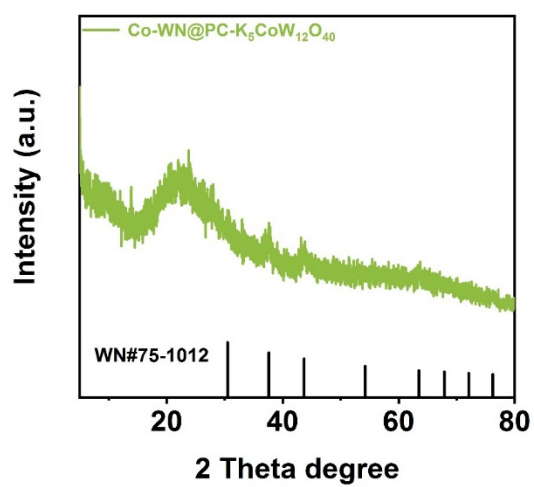

**Figure S3.** PXRD patterns of WN@PC-K<sub>5</sub>CoW<sub>12</sub>O<sub>40</sub> (obtained by the calcination of K<sub>5</sub>CoW<sub>12</sub>O<sub>40</sub>).

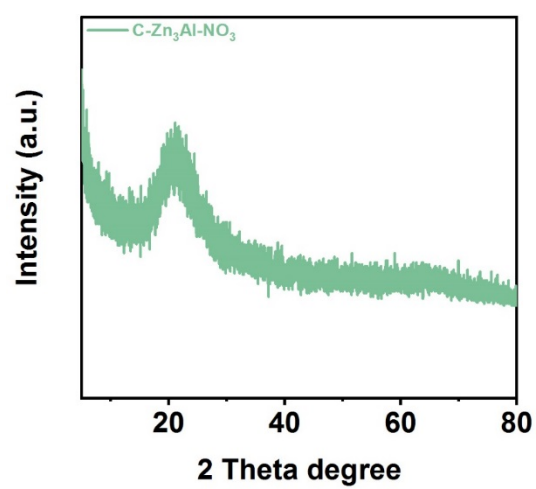

**Figure S4.** PXRD patterns of C-Zn<sub>3</sub>Al-NO<sub>3</sub> (obtained by the calcination of Zn<sub>3</sub>Al-NO<sub>3</sub>).

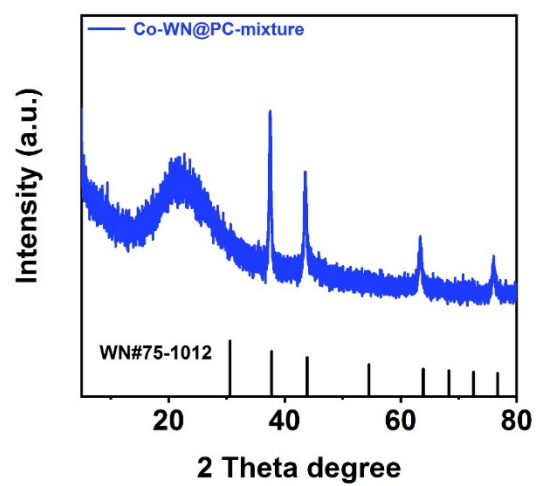

**Figure S5.** PXRD patterns of WN@PC-mixture (obtain by simple mixture of  $\text{Zn}_3\text{Al-NO}_3$  and  $\text{K}_5\text{CoW}_{12}\text{O}_{40}$ ).



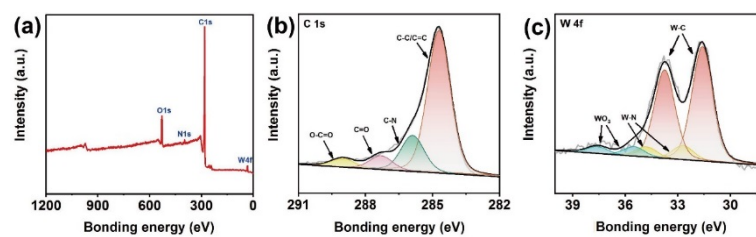

**Figure S6.** (a) X-ray photoelectron spectra of WN/W<sub>2</sub>C@PC-1. (b) The high-resolution C 1s XPS of WN/W<sub>2</sub>C@PC-1. (c) The high-resolution W 4f XPS of WN/W<sub>2</sub>C@PC-1.

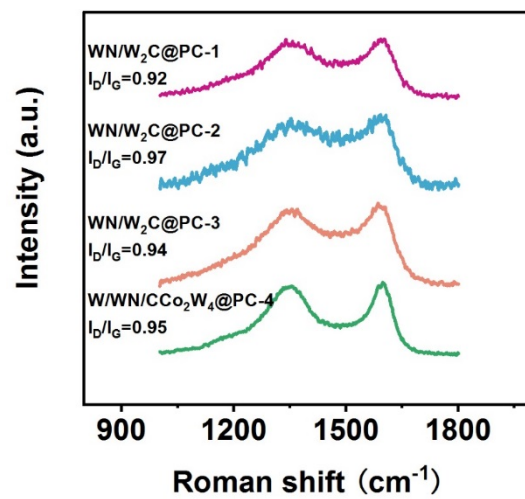

**Figure S7.** Raman spectra of WN/ $\text{W}_2\text{C}$ @PC-1, WN/ $\text{W}_2\text{C}$ @PC-2, WN/ $\text{W}_2\text{C}$ @PC-3 and W/WN/ $\text{CCo}_2\text{W}_4$ @PC-4.

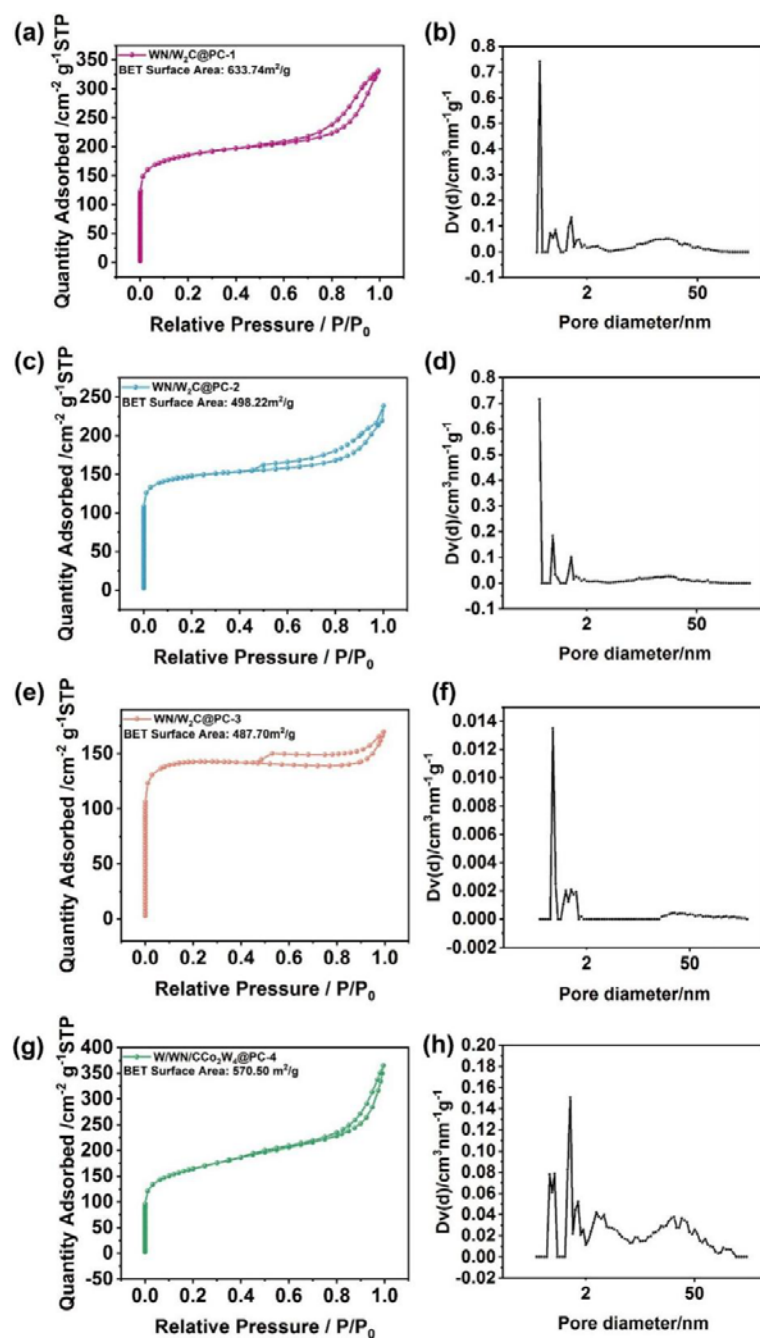

**Figure S8.**  $N_2$  adsorption-desorption isotherms of (a)  $WN/W_2C@PC-1$ , (c)  $WN/W_2C@PC-2$ , (e)  $WN/W_2C@PC-3$  and (g)  $W/WN/CCo_2W_4@PC-4$ . The pore-size distribution of (b)  $WN/W_2C@PC-1$ , (d)  $WN/W_2C@PC-2$ , (f)  $WN/W_2C@PC-3$  and (h)  $W/WN/CCo_2W_4@PC-4$ .

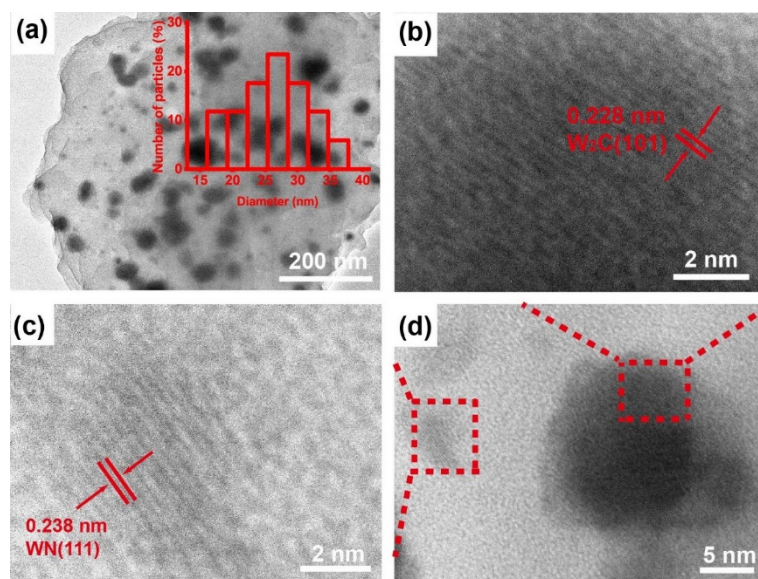

**Figure S9.** (a) TEM image of WN/W<sub>2</sub>C@PC-2 (Inset is the particle size distribution in WN/W<sub>2</sub>C@PC-2). (b-d) HRTEM images of WN/W<sub>2</sub>C@PC-2.

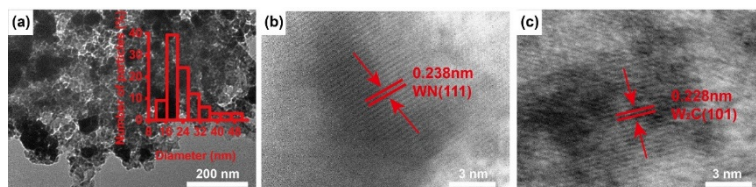

**Figure S10.** (a) TEM image of WN/W<sub>2</sub>C@PC-3 (Inset is the particle size distribution in WN/W<sub>2</sub>C@PC-3). (b-c) HRTEM images of WN/W<sub>2</sub>C@PC-3.

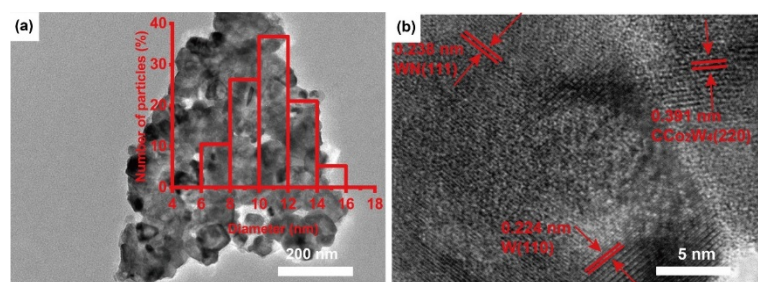

**Figure S11.** (a) TEM image of W/WN/CCo<sub>2</sub>W<sub>4</sub>@PC-4 (Inset is the particle size distribution in W/WN/CCo<sub>2</sub>W<sub>4</sub>@PC-4). (b-d) HRTEM images of W/WN/CCo<sub>2</sub>W<sub>4</sub>@PC-4.

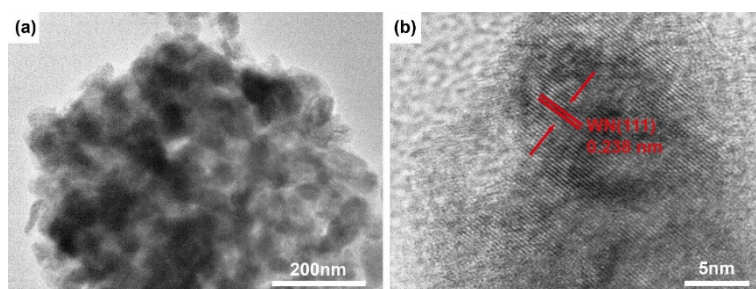

**Figure S12.** (a) TEM image of WN@PC-mixture. (b) HRTEM image of WN@PC-mixture.

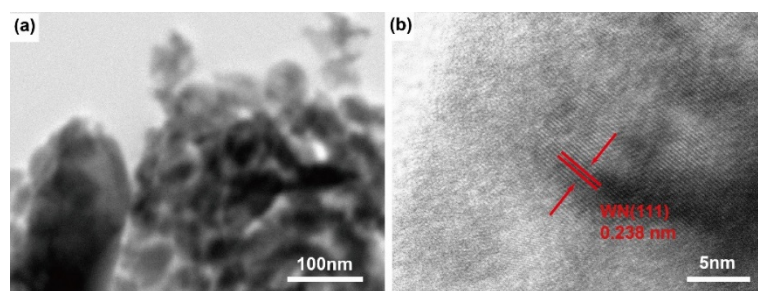

**Figure S13.** (a) TEM image of WN@PC- $\text{K}_5\text{CoW}_{12}\text{O}_{40}$ . (b) HRTEM image of WN@PC-  $\text{K}_5\text{CoW}_{12}\text{O}_{40}$ .



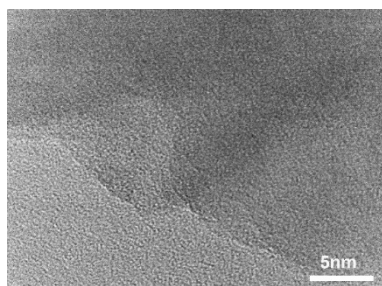

**Figure S14.** HRTEM image of C-Zn<sub>3</sub>Al-NO<sub>3</sub>.

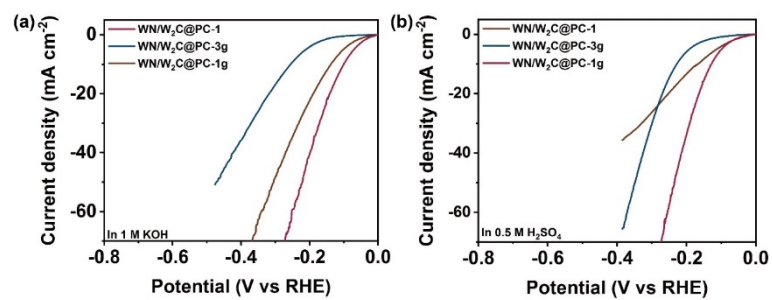

**Figure S15.** Polarization curves of samples obtained by different amounts of glucose and  $\text{NH}_4\text{Cl}$  in (a) 1.0 M KOH and (b) 0.5 M  $\text{H}_2\text{SO}_4$ .

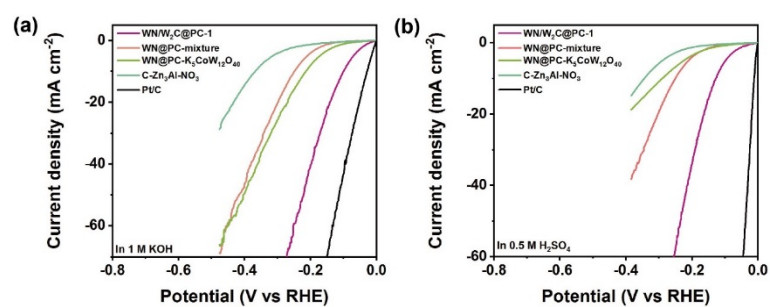

**Figure 16.** Polarization curves of WN/W<sub>2</sub>C@PC-1, WN@PC-mixture, WN@PC-K<sub>5</sub>CoW<sub>12</sub>O<sub>40</sub> and C-Zn<sub>3</sub>Al-NO<sub>3</sub> in (a) 1.0 M KOH and (b) 0.5 M H<sub>2</sub>SO<sub>4</sub>.

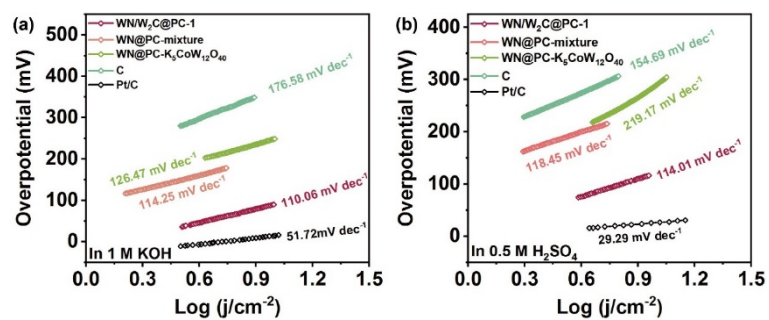

**Figure S17.** Tafel Slope of WN/W<sub>2</sub>C@PC-1, WN@PC-mixture, WN@PC-K<sub>5</sub>CoW<sub>12</sub>O<sub>40</sub> and C-Zn<sub>3</sub>Al-NO<sub>3</sub> in (a) 1.0 M KOH and (b) 0.5 M H<sub>2</sub>SO<sub>4</sub>.

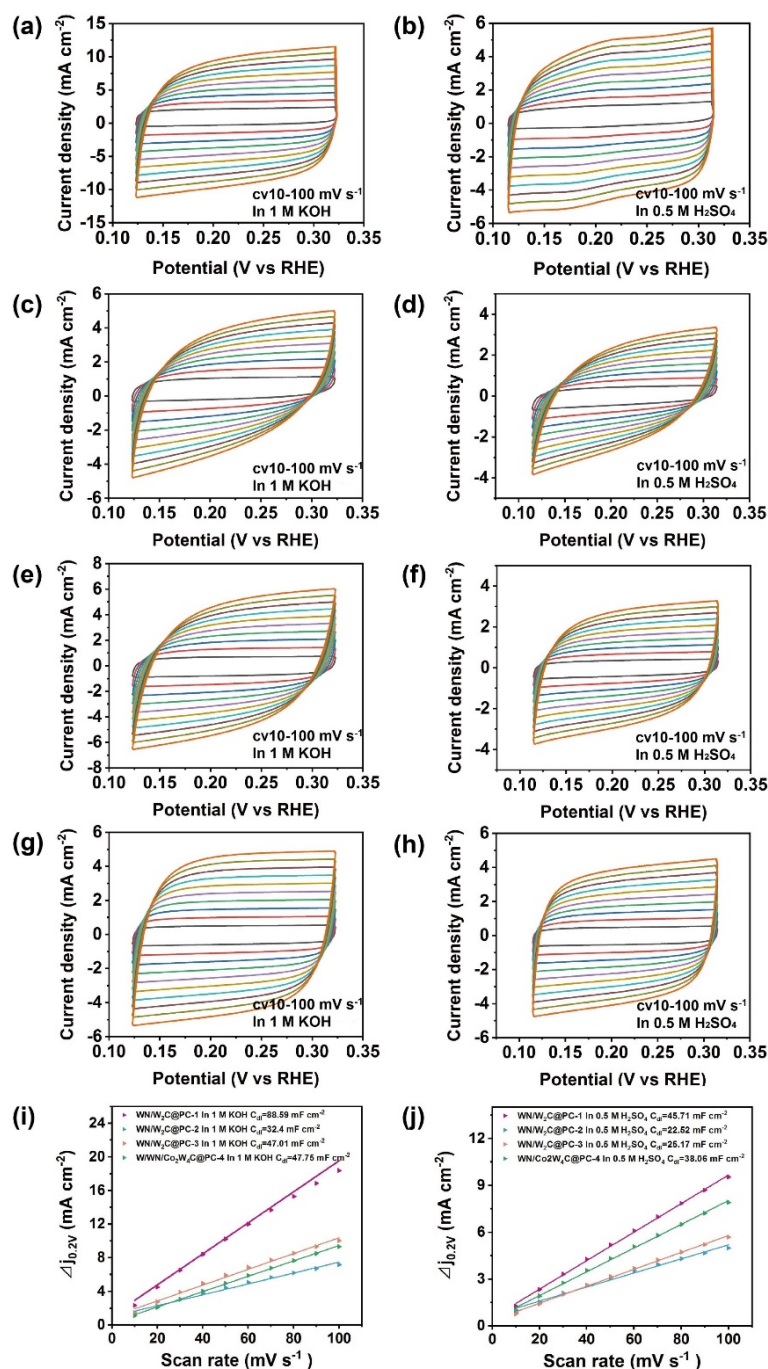

**Figure S18** (a-b) Cyclic voltammograms (CVs) of WN/W<sub>2</sub>C@PC-1 in 1 M KOH and 0.5 M H<sub>2</sub>SO<sub>4</sub>. (c-d) Cyclic voltammograms (CVs) of WN/W<sub>2</sub>C@PC-2 in 1 M KOH and 0.5 M H<sub>2</sub>SO<sub>4</sub>. (e-f) Cyclic voltammograms (CVs) of WN/W<sub>2</sub>C@PC-3 in 1 M KOH and 0.5 M H<sub>2</sub>SO<sub>4</sub>. (g-h) Cyclic voltammograms (CVs) of W/WN/CCo<sub>2</sub>W<sub>4</sub>@PC-4 in 1 M KOH and 0.5 M H<sub>2</sub>SO<sub>4</sub>. (i-j) Linear fitting of Δj (Δj = j<sub>a</sub> - j<sub>c</sub>) vs. scan rates at a given overpotential of +0.2V vs. RHE in 1 M KOH and 0.5 M H<sub>2</sub>SO<sub>4</sub>, respectively. j<sub>a</sub> represents the anodic current density and j<sub>c</sub> represents the cathodic current density.

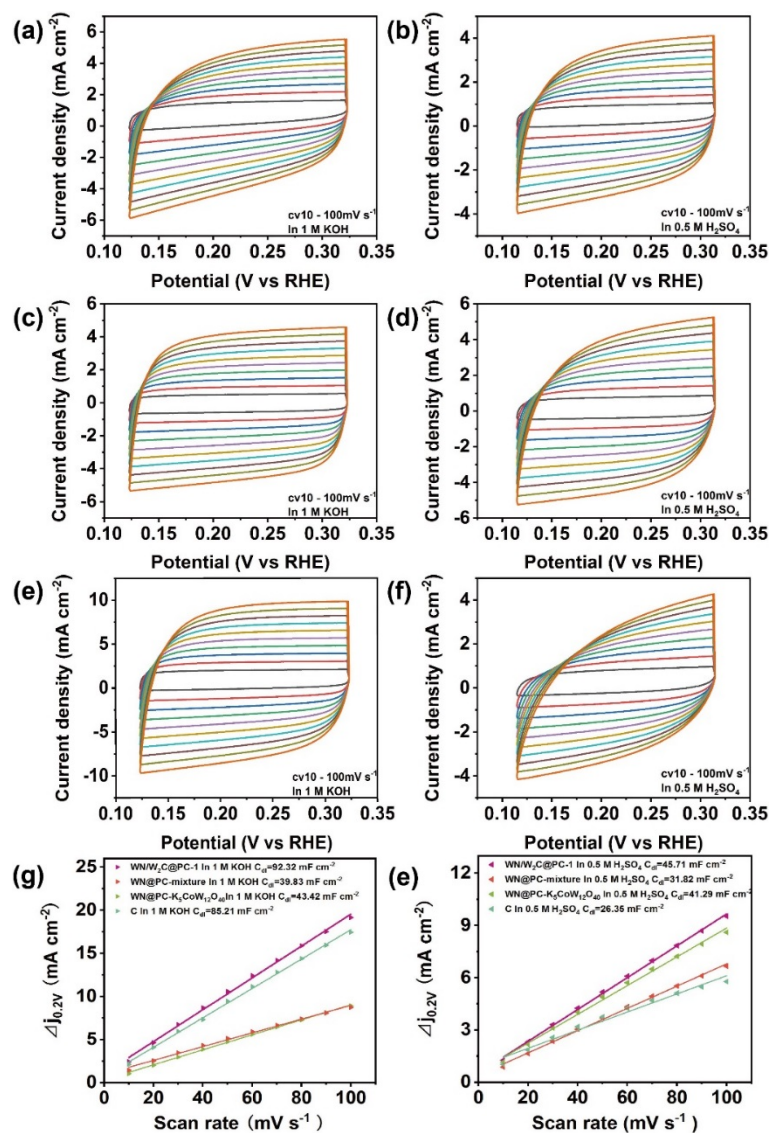

**Figure S19.** (a-b) Cyclic voltammograms (CVs) of WN@PC-mixture in 1 M KOH and 0.5 M H<sub>2</sub>SO<sub>4</sub>. (c-d) Cyclic voltammograms (CVs) of WN@PC-K<sub>5</sub>CoW<sub>12</sub>O<sub>40</sub> in 1 M KOH and 0.5 M H<sub>2</sub>SO<sub>4</sub>. (e-f) Cyclic voltammograms (CVs) of C-Zn<sub>3</sub>Al-NO<sub>3</sub> in 1 M KOH and 0.5 M H<sub>2</sub>SO<sub>4</sub>. (g-e) Liner fitting of  $\Delta j$  ( $\Delta j = j_a - j_c$ ) vs. scan rates at a given overpotential of +0.2V vs. RHE in 1 M KOH and 0.5 M H<sub>2</sub>SO<sub>4</sub>, respectively.  $j_a$  represents the anodic current density and  $j_c$  represents the cathodic current density.

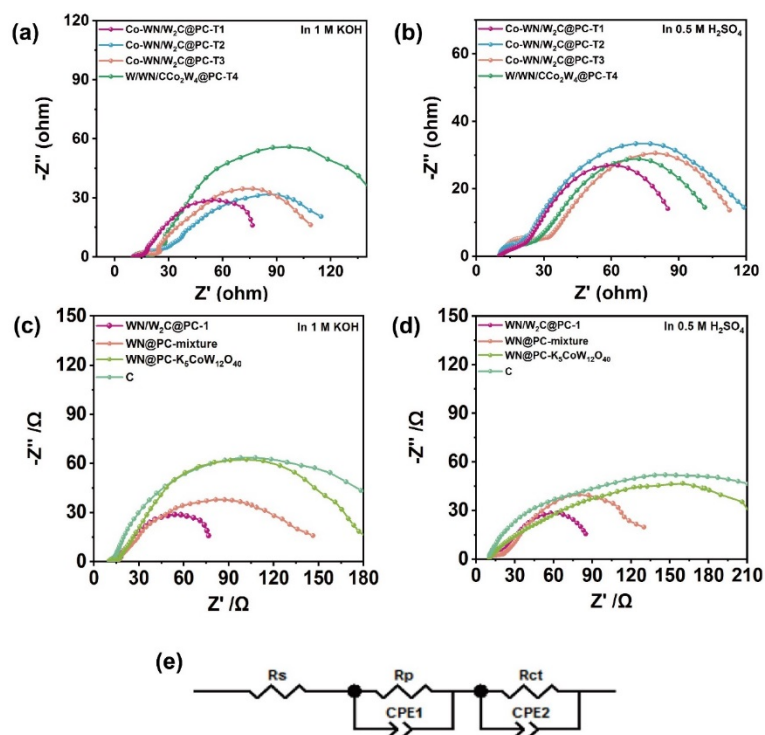

**Figure S20.** Electrochemical impedance spectra of catalysts obtained by different calcining conditions among 100 kHz to 0.01 Hz in (a) alkaline and (b) acidic media. Electrochemical impedance spectra of single component catalysts obtained among 100 kHz to 0.01 Hz in (a) alkaline and (b) acidic media. (e) The diagram of corresponding equivalent circuit.

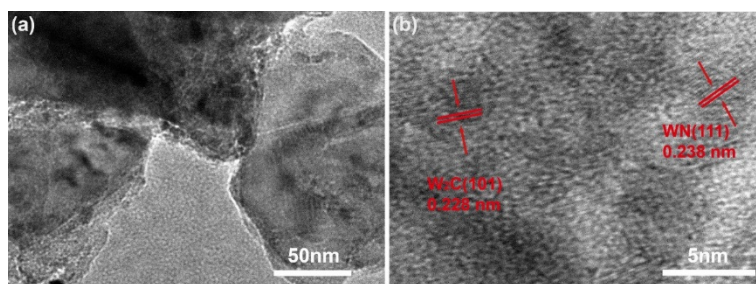

**Figure S21.** (a) TEM image of WN/W<sub>2</sub>C@PC-1 after HER test in 1 M KOH. (b) HRTEM images of WN/W<sub>2</sub>C@PC-1 after HER test in 1 M KOH.



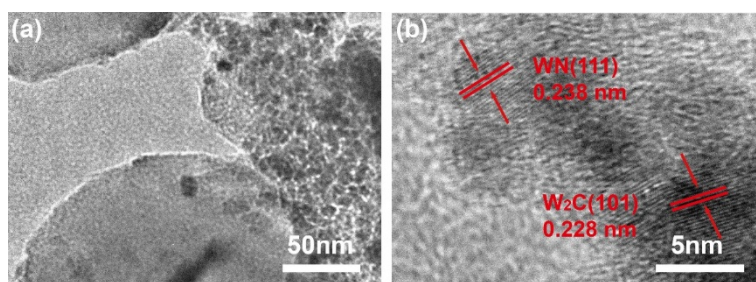

**Figure S22.** (a) TEM image of WN/W<sub>2</sub>C@PC-1 after HER test in 0.5 M H<sub>2</sub>SO<sub>4</sub>. (b) HRTEM images of WN/W<sub>2</sub>C@PC-1 after HER test in 0.5 M H<sub>2</sub>SO<sub>4</sub>.

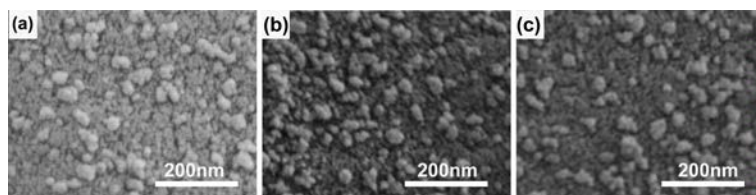

**Figure S23.** (a) SEM image of WN/W<sub>2</sub>C@PC-1 (a) before HER test (b) after HER test in 1 M KOH (c) after HER test in 0.5 M H<sub>2</sub>SO<sub>4</sub>.

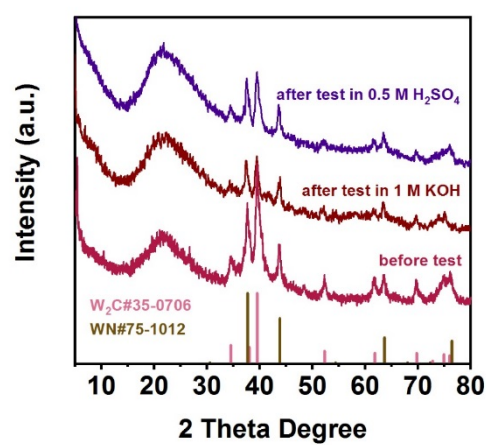

**Figure S24.** XRD patterns of WN/W<sub>2</sub>C@PC-1 after HER test in 0.5 M H<sub>2</sub>SO<sub>4</sub> and 1 M KOH.

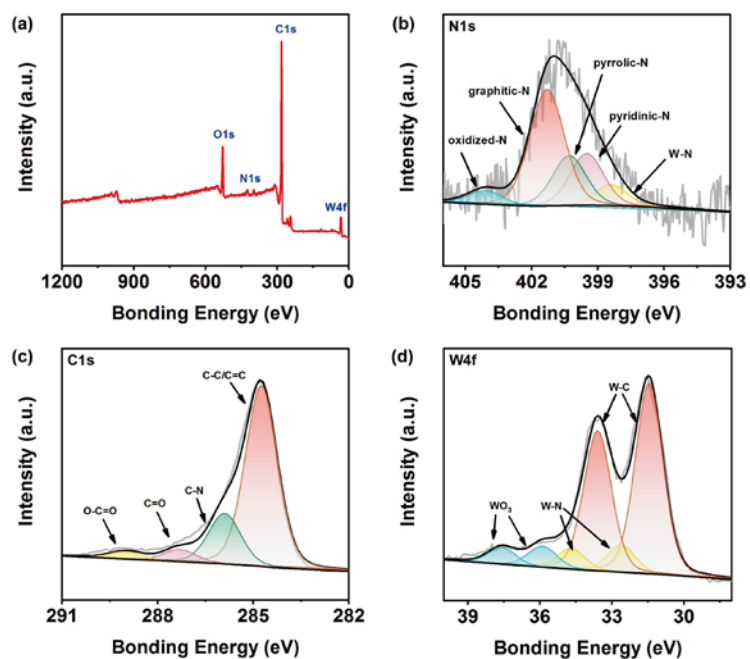

**Figure S25.** (a) X-ray photoelectron spectra of WN/W<sub>2</sub>C@PC-1 after HER test in 1 M KOH. (b) The high-resolution N 1s XPS of WN/W<sub>2</sub>C@PC-1 after HER test in 1 M KOH. (c) The high-resolution C 1s XPS of WN/W<sub>2</sub>C@PC-1 after HER test in 1 M KOH. (d) The high-resolution W 4f XPS of WN/W<sub>2</sub>C@PC-1 after HER test in 1 M KOH.

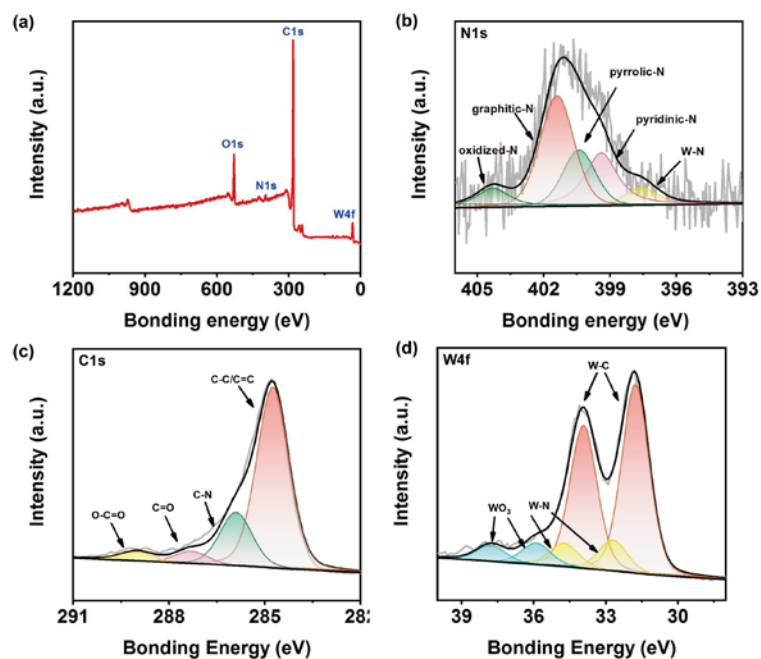

**Figure S26.** (a) X-ray photoelectron spectra of WN/W<sub>2</sub>C@PC-1 after HER test in 0.5 M H<sub>2</sub>SO<sub>4</sub>. (b) The high-resolution N 1s XPS of WN/W<sub>2</sub>C@PC-1 after HER test in 0.5 M H<sub>2</sub>SO<sub>4</sub>. (c) The high-resolution C 1s XPS of WN/W<sub>2</sub>C@PC-1 after HER test in 0.5 M H<sub>2</sub>SO<sub>4</sub>. (d) The high-resolution W 4f XPS of WN/W<sub>2</sub>C@PC-1 after HER test in 0.5 M H<sub>2</sub>SO<sub>4</sub>.

#### 4. Comparison of electrocatalysts parameters of different non-Pt catalysts

**Table S1.** Comparison of HER activities in acidic solution for WN/W<sub>2</sub>C@PC electrocatalysts.

| Catalysts                              | Current density (j, mA cm <sup>-2</sup> ) | $\eta$ at corresponding j (mV) | Ref.                                            |
|----------------------------------------|-------------------------------------------|--------------------------------|-------------------------------------------------|
| <b>WN/W<sub>2</sub>C@PC</b>            | <b>10</b>                                 | <b>121.3</b>                   | <b>This work</b>                                |
| WN NW/CC                               | 10                                        | 134                            | J. Mater. Chem. A 5 (2017) 19072                |
| WC-CNTs                                | 10                                        | 145                            | ACS Nano 9 (2015) 5125–5134                     |
| P-W <sub>2</sub> C@NC                  | 10                                        | 89                             | J. Mater. Chem. A 5 (2017) 765                  |
| W <sub>2</sub> C/MWNT                  | 10                                        | 123                            | Nat. Commun. 7 (2016) 13216                     |
| W-W <sub>2</sub> C/CNT                 | 10                                        | 155                            | ACS Sustainable Chem. Eng. 7 (2019) 10016–10024 |
| W <sub>2</sub> C@WC <sub>1-x</sub> /Mo | 10                                        | 58                             | J. Mater. Chem. A 8 (2020) 19473                |
| CoP/NCNT-CP                            | 10                                        | 165                            | ACS Sustainable Chem. Eng. 7 (2019) 10044–10051 |
| CoFeNiMo@NCNT                          | 10                                        | 209.9                          | Appl. Catal. B Environ. 280 (2021) 119421       |
| Ni/Mo <sub>6</sub> Ni <sub>6</sub> C@C | 10                                        | 122                            | Chem. Eng. J. 405 (2021) 12696                  |

**Table S2.** Comparison of HER activities in basic solution for WN /W<sub>2</sub>C@PC electrocatalysts.

| Catalysts                                                            | Current density (j, mA cm <sup>-2</sup> ) | $\eta$ at corresponding j (mV) | Ref.                                            |
|----------------------------------------------------------------------|-------------------------------------------|--------------------------------|-------------------------------------------------|
| <b>WN/W<sub>2</sub>C@PC</b>                                          | <b>10</b>                                 | <b>91</b>                      | <b>This work</b>                                |
| W <sub>2</sub> N/WC                                                  | 10                                        | 148.5                          | Adv. Mater. 32 (2020) 1905679                   |
| WC-CNTs                                                              | 10                                        | 150                            | ACS Nano 9 (2015) 5125–5134                     |
| Mo-WC@NCS                                                            | 10                                        | 179                            | Nano Energy 74 (2020) 104850                    |
| $\delta$ -WN/Fe                                                      | 10                                        | 209                            | J. Mater. Chem. A 6 (2018) 10967                |
| W-W <sub>2</sub> C/CNT                                               | 10                                        | 147                            | ACS Sustainable Chem. Eng. 7 (2019) 10016–10024 |
| Mo <sub>2</sub> C-WC/NCAs                                            | 10                                        | 126                            | Chem. Eng. J. 408 (2021) 127270                 |
| CoP/NCNT-CP                                                          | 10                                        | 230                            | ACS Sustainable Chem. Eng. 7 (2019) 10044–10051 |
| (Fe <sub>0.75</sub> Co <sub>0.25</sub> ) <sub>5</sub> C <sub>2</sub> | 10                                        | 174                            | Science Bulletin 63 (2018) 1358–1363            |
| Fe <sub>7</sub> S <sub>8</sub> /FeS <sub>2</sub>                     | 10                                        | 113                            | Adv. Funct. Mater. 32 (2022) 2107802            |

[1] T. Li, L. Jin, W. Zhang, H.N. Miras, Y.F. Song, ChemCatChem 10 (2018) 4699–4706.
